1  
2  
3  
4  
5  
6  
7  
8  
9  
10  
11  
12  
13  
14  
15  
16  
17  
18  
19  
20  
21  
22  
23  
24  
25  
26  
27  
28  
29  
30  
31  
32  
33  
34  
35  
36  
37

## **Analysis of Local Variability and Allostery in Macromolecular Assemblies using Cryo-EM and Focused Classification**

Cheng Zhang<sup>1‡</sup>, William Cantara<sup>2‡</sup>, Youngmin Jeon<sup>1</sup>, Karin Musier-Forsyth<sup>2</sup>, Nikolaus Grigorieff<sup>3\*</sup>, and Dmitry Lyumkis<sup>1\*</sup>

1. Salk Institute for Biological Studies, 10010 N Torrey Pines Rd, La Jolla, CA 92037, USA.
2. Department of Chemistry and Biochemistry, Ohio State University, Columbus, OH 43210, USA.
3. Janelia Research Campus, Howard Hughes Medical Institute, 19700 Helix Drive, Ashburn, VA, USA.

‡ equal contribution

\* Correspondence: [niko@grigorieff.org](mailto:niko@grigorieff.org) or [dlyumkis@salk.edu](mailto:dlyumkis@salk.edu)

38 **Abstract**

39  
40 Single-particle electron cryo-microscopy and computational image classification can be used to  
41 analyze structural variability in macromolecules and their assemblies. In some cases, a particle  
42 may contain different regions that each display a range of distinct conformations. We have  
43 developed strategies, implemented within the Frealign and *cis*TEM image processing packages, to  
44 focus classify on specific regions of a particle and detect potential covariance. The strategies are  
45 based on masking the region of interest using either a 2-D mask applied to reference projections  
46 and particle images, or a 3-D mask applied to the 3-D volume. We show that focused classification  
47 approaches can be used to study structural allostery, a concept that is likely to gain more  
48 importance as datasets grow in size, allowing the distinction of more structural states and smaller  
49 differences between states. Finally, we apply the approaches to an experimental dataset containing  
50 the HIV-1 Transactivation Response (TAR) element RNA fused into the large bacterial ribosomal  
51 subunit, to deconvolve structural mobility within localized regions of interest.

52

53 **Highlights**

54

- 55
- Description of different image classification strategies in single-particle cryo-EM
  - Quantitative evaluation of two classification methods using simulated data
  - Application of the two classification methods to an experimental dataset
- 57

58

59

60 **Keywords**

61

62 Single-particle cryo-EM, *cis*TEM, classification, heterogeneity, ribosome

## 63 **1. Introduction**

64  
65 Single-particle electron cryo-microscopy (cryo-EM) enables the visualization of macromolecules and their  
66 assemblies under near-native conditions [1]. In recent years, the technique has gained popularity, in part  
67 due to its ability to determine macromolecular structures at near-atomic resolution and without the need for  
68 crystallization [2]. While advances in resolution [3,4] have expanded the scope of the technique over the  
69 last five years, the ability to decipher structural heterogeneity is an ongoing area of development in the field  
70 [5,6]. Given that macromolecules, and especially their assemblies, are dynamic, image classification opens  
71 up the possibility to address novel types of questions pertaining to the molecular mechanisms underlying  
72 their function.

73  
74 Structural heterogeneity can be either compositional or conformational in nature. Compositional  
75 heterogeneity means that the stoichiometry of subunits within an assembly varies within the dataset, such  
76 as particles containing or missing an additional, loosely associated protein factor. Conformational  
77 heterogeneity assumes that particles are uniform in composition, but the constituent components within  
78 each object can be flexible and can adopt one of several structurally different states. Conformational  
79 heterogeneity can be further subdivided into either discrete or continuous conformational heterogeneity. In  
80 the former case, the macromolecule would adopt one of several distinct structural states, each represented  
81 by a local minimum within the energy landscape describing all possible states. In the latter case, no distinct  
82 local energy minima exist, and the flexible regions can move in a mostly random manner. Finally, a fourth  
83 case can be defined as containing a combination of the above scenarios.

84  
85 To understand structural heterogeneity within a single-particle experiment, the particle images are subject  
86 to a classification procedure, which assigns each particle to one of potentially many different classes. In  
87 the simplest scenario, a global classification strategy assigns each particle into a specific class on the basis  
88 of variability across the entire image. Different classification approaches have been developed, including  
89 supervised and unsupervised techniques, and numerous variations have been implemented to analyze  
90 structural heterogeneity [6-11]. Global 3-D classification does not require specific knowledge about the  
91 type and location of the heterogeneity, making it an integral part of today's processing workflow of virtually  
92 all single-particle software packages. Given that macromolecular assemblies can be highly dynamic, and  
93 because every subdivision leads to fewer particles within each class (and thus lower signal and loss of  
94 resolution), the fundamental disadvantage of a global classification strategy is the limited number of well-  
95 defined classes that can be recovered from a dataset of a given size. This is particularly true when one  
96 wants to resolve variability in small, heterogeneous regions that may easily be lost during a global

97 classification procedure. In contrast to a global classification strategy, “focused classification” zooms in  
98 on a region or feature of interest, in order to understand structural heterogeneity in a localized manner [12-  
99 15]. Focused classification can overcome the potential particle number limit associated with global  
100 classification by reducing the number of classes needed to represent the local variability and (in principle)  
101 excluding other regions of the particle from the analysis. This approach is particularly advantageous when  
102 regions outside of the area of interest are themselves dominated by structural heterogeneity. For example,  
103 minor domain movements within an otherwise dynamic macromolecular assembly might be difficult to  
104 resolve using global classification techniques alone because the majority of the signal guiding the  
105 classification procedure is dominated by regions outside of the area of interest. In another example, two  
106 large regions can exhibit independent variability, and a global classification may not converge on a solution  
107 that represents all possible states, or the number of states required leaves too few particles in the  
108 corresponding reconstructions, limiting their resolution. In general, focused classification provides an  
109 alternative means to deconstruct highly dynamic and/or heterogeneous datasets, reducing the analysis to a  
110 more tractable problem. Numerous successful applications of focused classification have been used to  
111 understand the independent movements of regions of large macromolecular complexes, such as the  
112 spliceosome and the ribosome [16-19].

113  
114 Focused classification requires selecting a region of interest within the particle and excluding the remaining  
115 density. In the simplest implementation, a 3-D mask is applied to the reconstructed densities after each  
116 iteration to select the area of interest, and standard global classification is then performed using the masked  
117 reconstructions as references. A typical example of this is the classification of membrane proteins that  
118 contain detergent micelles: the 3-D mask is used to exclude the heterogeneous micelle while focusing on  
119 the protein [20]. The primary disadvantage of this “3-D masking” approach is that a projection of the  
120 density, which *only* contains the masked region, is compared with the particle image, which contains the  
121 masked region *in addition to* all other overlapping density, and this additional density can obscure the  
122 features to be classified. To reduce the problem of density discrepancy, the density outside the mask could  
123 be included in the reference after applying a low-pass filter [21,22]. The filter removes noise from the  
124 disordered regions of the particle while maintaining valid low-resolution signal to minimize the mismatch  
125 between reference and images. To further reduce density mismatch, another approach has been introduced,  
126 whereby, in addition to masking the 3-D object, the density outside the mask is computationally subtracted  
127 from the particle images [12,13,15]. This leaves a projection of the masked 3-D object and a density-  
128 subtracted 2-D particle image, which contains comparable features that can be used for classification.  
129 Another advantage of the “density subtraction” approach is that it can, in principle, be implemented in a  
130 hierarchical fashion, in order to subtract increasingly finer features in a step-wise manner. The (non-

131 hierarchical) density subtraction approach has been used to improve heterogeneous regions of numerous  
132 macromolecular complexes that could not be improved using a global classification approach alone  
133 [12,13,15,19,23]. However, there are also disadvantages to this method. First, density subtraction requires  
134 an accurate measure of the signal in each particle image to properly subtract the desired density. Especially  
135 when looking at small regions and subtracting density corresponding to larger volumes, the subtraction may  
136 leave residual signal in the raw images, a problem that is exacerbated if the complex exhibits greater  
137 heterogeneity than is accounted for in the references used for density subtraction. The residual signal from  
138 the incomplete density subtraction can interfere with subsequent classification and obscure the variability  
139 in smaller regions (especially if applied in a hierarchical context). We and others have introduced another  
140 approach, where focused classification is performed in 2-D, with masks imposed on both the projection  
141 images and the experimental data [14,22]. In this alternative approach, a 3-D mask is defined for a region  
142 of interest, projected along the view determined for each particle and applied as a 2-D mask to the particle  
143 images and reference projections. Such an approach has been described in the context of bootstrap  
144 resampling and using the cross-correlation function to find the optimal solution [14] and has now been  
145 implemented within a likelihood-based framework in Frealign [8,22] and *cis*TEM [24]. The advantage of  
146 the “2-D masking” approach with focused classification is that it does not require signal subtraction, while  
147 constraining the classification to the area in the 2-D images that contain the region of interest and removing  
148 noise outside this region.

149  
150 A major advantage of any focused classification approach is its ability to selectively classify features of  
151 interest within a distinct region of a cryo-EM map, which opens up numerous potential directions. First, it  
152 enables classification of pseudo-symmetric features in a particle that are related by a symmetry operator  
153 but not strictly symmetric due to independently dynamic mobility [15,25,26]. For example, surface-  
154 exposed regions of macromolecules may not obey the strict symmetry that may apply to the particle core,  
155 leading to loss of resolution in the surface regions of otherwise symmetric particles such as icosahedral  
156 viruses (reviewed in [27]). To classify pseudo-symmetric regions of a particle, the images are first aligned  
157 according to a common reference frame compatible with the pseudo-symmetry. The symmetry is then  
158 dropped, and multiple alignments for each particle image are determined, corresponding to all possible  
159 symmetry-related views, and an asymmetric reconstruction is calculated using each particle image multiple  
160 times to include all symmetry-related alignments. This effectively multiplies the number of particles in a  
161 dataset by the number of different possible symmetry operations and enables classification of different  
162 views into different classes, thereby resolving the heterogeneity in the pseudo-symmetric regions. This  
163 approach can, therefore, improve the resolution of density that would otherwise be an average of multiple  
164 structural states due to symmetrization. The approach has been applied, for example, to resolve density

165 detail that was not visible after global classification alone [26], and to reveal genome structures within viral  
166 particles [28] (for other examples, see [27]). Second, selectively focusing on discrete asymmetric units can  
167 reveal covariant heterogeneity within the data. For example, two different regions located on opposite sides  
168 of a particle might be structurally coupled with each other. If the variability of two regions is random, there  
169 should be no correlation in the assignment of these regions to different classes during pseudo-symmetric  
170 classification. However, if correlation is present, this indicates covariance in the two regions. In the  
171 simplest case, counting of the number of matching asymmetric units within the same class, and comparison  
172 with a random distribution, would provide evidence for structural allostery. This phenomenon represents  
173 an area of development that may facilitate understanding global structural landscapes of dynamic  
174 macromolecular machines.

175  
176 In this manuscript, we explore several different focused classification strategies with both synthetic and  
177 experimental data. We show the advantages and disadvantages of the “2-D masking” and “3-D masking”  
178 approaches, and additionally explore their ability to discover density covariances within otherwise distinct  
179 regions of a reconstruction. Finally, we show how focused classification can be applicable to heterogeneous  
180 experimental datasets, highlighting a particular test case that is relevant to visualizing mounted targets on  
181 scaffolds using single-particle cryo-EM.

182

## 183 **2. Materials and methods**

184

185 **2.1 Generation of synthetic humanoid datasets.** Synthetic datasets were generated as previously described  
186 [8]. Briefly, we randomly shifted and rotated projection images of humanoid structures, added noise, a CTF  
187 (to have CTF-modulated noise components), envelope function, and a final layer of noise. To reduce  
188 spurious correlations associated with the CTF for covariance analysis, we used a 640-pixel box size for  
189 projecting the data, and prior to the addition of noise and the CTF. 28 distinct datasets were made,  
190 corresponding to the different structural combinations of arms, hands, and feet (Figure 1). Combined  
191 datasets corresponding to the three distinct scenarios were then generated from the individual 28 datasets.  
192 Each combined dataset contained 10,000 particles (pixel size 5.24, box size 80 after Fourier resampling)  
193 with each of the 28 sub-datasets selected randomly.

194

195 **2.2 Particle assignment during focused classification.** To facilitate quantitative assessment, we made the  
196 assumption that each classified particle belongs to the class with the highest probability (occupancy in  
197 Frealign/cisTEM). At higher SNRs, this was an insignificant assumption, as most occupancies were close  
198 to 1; however, at lower SNRs, particles are represented by lower occupancies in multiple classes with slight

199 differences between them. By assuming that each asymmetric unit corresponds to the class with the highest  
200 occupancy, we could simplify the calculation of  $\kappa$  coefficients and other analyses.

201  
202 **2.3 Measures for evaluating the accuracy of classification.** To evaluate the accuracy of each classification  
203 trajectory, we define the following measures. For each asymmetric unit in each class:

- 204 - TP (true positive) — starting occupancy 100, ending marginal occupancy greater than all other  
205 classes.
- 206 - FP (false positive) — starting occupancy 0, ending marginal occupancy greater than all other  
207 classes.
- 208 - TN (true negative) — starting occupancy 0, ending occupancy less than the class with greatest  
209 marginal occupancy
- 210 - FN (false negative) — starting occupancy 100, ending occupancy less than the class with greatest  
211 marginal occupancy
- 212 - N: number of observations — TP+FP+TN+FN

213  
214 Using the definitions above, the following metrics are defined:

215 Accuracy (the relative observed agreement among raters, or  $P_o$ ) =  $(TP + TN) / N$

216 Sensitivity = True Positive Rate (TPR) =  $TP / (TP + FN)$

217 Specificity = True Negative Rate (TNR) =  $TN / (TN + FP)$

218 Kappa:

219 
$$\frac{P_o - P_e}{1 - P_e} = 1 - \frac{1 - P_o}{1 - P_e}$$

220  
221 where  $P_o$  is the accuracy, above, and  $P_e$  is the probability of chance agreement.

222 Youden's Index (J Statistic) =  $TPR + TNR - 1$ .

223  
224 **2.4 Merging cryo-EM difference maps.** Merging of the difference maps in Figure 4 was performed  
225 according to the following procedure. A merge volume was generated with 0s for the pixel values.  
226 Subsequently, for each pairwise difference map, and for each voxel, if the value of the voxel is greater than  
227 the value of this voxel in the merged map, set this as the value in the merged map.

228  
229 **2.5 Covariance analysis of separate regions of cryo-EM density maps.** To determine whether different  
230 regions correlate with one another, normalized covariances were computed comparing fractional density  
231 occupancies of distinct components. An identical procedure was used for both scenarios 2 and 3. First, we

232 performed 3-D focused classification, with the requested number of classes,  $k$ , identical to the expected  
233 number of non-degenerate asymmetric units. Binary masks were created for each region of interest (ROI),  
234 namely the hand in each of two positions, the near foot, and the far foot. The masks encompassed the ROI,  
235 with minimal incursion into neighboring density. A soft edge was not employed, because the mask was  
236 solely used for the purpose of computing fractional density occupancy values. For each of the  $k$  resulting  
237 maps, and for each ROI, the mask was used to extract the resulting density. Subsequently, the approximate  
238 mass in the ROI was calculated using the “volume” command implemented within the EMAN1 processing  
239 suite [29]. The resulting mass was optionally normalized to the true mass arising from a perfect  
240 classification to judge the quality of the classification, although this step is not strictly necessary for  
241 normalized covariance analysis. Finally, the normalized covariance matrix  $R_{ij}$  was computed as:

$$242 \quad R_{ij} = \frac{C_{ij}}{\sqrt{C_{ii} * C_{jj}}}$$

243 where  $C_{ij}$  refers to the covariance between two components  $i$  and  $j$ . To make sure that there was adequate  
244 sampling, the resulting volumes represent an average of 3 independent runs, using random starting class  
245 occupancy values for initiating each classification.

246  
247 **2.6 Ribosome preparation.** The 57-nt HIV-1 TAR element was appended inserted into twelve different  
248 helices (H9, H12, H19, H24, H25, H31, H45, H46, H59, H63, H68 and H98) by replacement of the loop  
249 residues to screen for optimal attachment sites. These twelve were chosen based on their location on the  
250 periphery of the ribosome and lack of tertiary contacts. All insertions resulted in viable bacterial growth  
251 (albeit much slower in some cases). H45 qualitatively yielded the most complete density with the least  
252 apparent mobility of the attached RNA (data not shown). Uniformly labeled ribosomes were prepared in  
253 the same way for all insertions. To ensure that all ribosomes contain the appended construct, a well-  
254 established protocol for introducing and characterizing site-specific mutations into *Escherichia coli*  
255 ribosomes was used [30,31]. Briefly, a  $\Delta 7 prrn$  *E. coli* strain SQZ10 [32], which has a genomic deletion of  
256 all rRNA genes, was used. The rRNA genes are supplied by a plasmid that also contains the *levansucrase*  
257 gene and confers kanamycin resistance (Plasmid 1, pHK-rnC-sacB). Levansucrase expression is lethal to  
258 *E. coli* when grown on sucrose-containing media [33]. An additional ampicillin-resistant plasmid  
259 containing the rRNA genes with the RNA construct of interest inserted (Plasmid 2, p278) was then  
260 transformed and grown in liquid culture. Cells were plated on media containing ampicillin and 5% sucrose  
261 to select for those that had lost Plasmid 1 but retain Plasmid 2. To confirm the selection, colonies were  
262 plated on Kan media to ensure that they cannot grow.

263  
264 Insertion of TAR into helix 45 of p278 was carried out using site-directed ligase-independent mutagenesis



265 [34]. Mutant plasmids were then transformed into SQZ10 cells and selected using the strategy described  
266 above. Mutant ribosomes were purified by first growing to mid-logarithmic phase ( $OD_{550} = 0.3-0.5$ ) in 500  
267 mL Luria Broth while shaking at 37 °C then chilled on ice for 30 minutes and pelleted by centrifugation.  
268 The cell pellet was then resuspended in 20 mL Resuspension Buffer (20 mM Tris-HCl, pH 7.5, 10 mM  
269  $MgCl_2$ , 100 mM  $NH_4Cl$ , 0.5 mM EDTA, 2 mM  $CaCl_2$ , 6 mM  $\beta$ -mercaptoethanol). The resulting  
270 resuspension was lysed through a French Press three times, filtered through a 0.45  $\mu m$  syringe filter and  
271 clarified by centrifugation at 18,000g for 30 minutes twice. The supernatant was concentrated to ~500  $\mu L$   
272 using a 50K MWCO filter (Amicon) and layered onto 36 mL 10-40% sucrose gradient in Gradient Buffer  
273 (50 mM Tris-HCl, pH 7.5, 10 mM  $MgCl_2$ , 100 mM  $NH_4Cl$ , 6 mM  $\beta$ -mercaptoethanol) and ultracentrifuged  
274 in SW-32Ti rotor at 16,700g for 18.5 hours at 4 °C. 70S ribosomes fractions were collected, buffer  
275 exchanged into Storage Buffer (20 mM Tris-HCl, pH 7.5, 10 mM  $MgCl_2$ , 100 mM  $NH_4Cl$ , 6 mM  $\beta$ -  
276 mercaptoethanol), aliquoted and stored at 4 °C until ready for grids.

277  
278 **2.7 Cryo-EM grid preparation and data acquisition.** 2.5  $\mu l$  of purified ribosomes after sucrose  
279 fractionation were diluted to a concentration of 4 mg/ml with Storage Buffer and placed on UltrAuFoil  
280 R1.2/1.3 300-mesh grids (Quantifoil) that were plasma-cleaned (75% argon/25% oxygen atmosphere, 15  
281 W for 7 s using a Gatan Solarus). After 1 min incubation under >80% humidity at 4 °C, grids were blotted  
282 manually with a filter paper (Whatman No. 1) before being plunged into liquid ethane cooled by liquid  
283 nitrogen using a manual plunger. Legimon was used for automated EM image acquisition [35]. Grids were  
284 imaged on a Titan Krios microscope (FEI) operating at 300kV and equipped with a K2 Summit direct  
285 electron detector (Gatan). A nominal magnification of 22,500x was used for data collection, giving a pixel  
286 size of 1.31 Å at the specimen level, with the defocus range of -0.5  $\mu m$  to -2.5  $\mu m$ . Movies were recorded  
287 in counting mode with an accumulated total dose ~50 electrons/Å<sup>2</sup> fractionated into 60 frames with an  
288 exposure rate of ~7 electrons/pixel/s.

289  
290 **2.8 Image processing and model generation.** All pre-processing was performed within the Appion suite  
291 [36]. Motion correction was carried out by using the program MotionCor2 [37] and exposure-filtered in  
292 accordance with the relevant radiation damage curves [38]. The CTF for each micrograph was estimated  
293 using CTFFind4 [39] during data collection. 70S ribosomes served as a template for automatic particle  
294 picking using FindEM [40]. 346K particles were selected and subjected to per-particle CTF estimation  
295 using the program GCTF [41]. After 2D and 3D classification in GPU-enabled Relion [42,43], selected  
296 classes containing 232K particles were combined to a single stack and imported to Frealign for global  
297 refinement with 8 classes. Every ten cycles of refinement/classification, the reconstructed maps of all 8  
298 classes were aligned to a common 50S scaffold using custom scripts implemented for performing a 3-D

299 alignment within the Chimera package [44] while running Frealign/*cis*TEM, in order to maintain a common  
300 reference-frame for subsequent focused classification. A total of 50 cycles of global  
301 refinement/classification were performed. Subsequently, the best orientations were combined into a single  
302 parameter file for focused classification. Focused classification was performed for 500 cycles, and without  
303 further alterations to the orientations, by defining a spherical mask of 30 Å, centered on the expected region  
304 of TAR. Global resolution for the final map was estimated using the Fourier shell correlation (FSC [45]) at  
305 0.143 and directional resolution anisotropy was evaluated by the 3D FSC server [46]. Local resolution  
306 estimation was performed using sxlocres.py implemented within Sparx [47].

307  
308 The model of TAR attached to H45 of the 23S ribosome was prepared by first removing the loop residues  
309 of H45 from a recent 2.9 Å structure, PDB ID 5AFI [48], and removing the polyA nucleotides from a model  
310 of TAR based on small-angle X-ray scattering data. The terminal backbone atoms were docked and aligned  
311 in UCSF Chimera [44]. The TAR region was then rigid-body refined into the cryo-EM density in Coot  
312 [49].

313

### 314 **3. Results**

315

#### 316 *3.1 Quantitative characterization of focused classification with 2-D and 3-D masking*

317

318 3-D classification with different masking options, including the 3-D masking and 2-D masking, have been  
319 described and implemented within Frealign [8,22] and *cis*TEM [24]. In the present study, we quantitatively  
320 characterize the performance of these different options using simulated data, highlighting strengths and  
321 weaknesses of each approach. We generated multiple synthetic datasets that are characterized by various  
322 degrees of heterogeneity. Figure 1 shows the distinct components of a “humanoid” reconstruction, with  
323 the legs, body, neck, and head positioned identically, and representing the constant, homogeneous regions  
324 of a particle, characterized by twofold rotational symmetry. In contrast, the arms can belong to one of two  
325 conformations, and are therefore characterized by pseudo-symmetry. Lastly, the hands and feet, which  
326 represent small features of a map that might be lost during global classification, can be either present or  
327 absent. We generated maps representing all possible combinations of these features and created multiple  
328 synthetic datasets containing random translations and rotations, a contrast transfer function (CTF), an  
329 envelope function, and multiple levels of noise, bringing the final CTF-modulated SNR down to 0.100,  
330 0.050, 0.025, 0.013, or 0.006, as previously described (Supplementary Figure 1 and [8,50]). Below, we  
331 describe three scenarios, which serve to demonstrate different aspects of focused classification.  
332 Importantly, in all described cases, focused classification is performed on an asymmetric subunit basis,

333 which allows one to break down and constrain the heterogeneity problem [27] and reveal discrete  
334 movements within a more complex landscape of heterogeneity.

335  
336 *First scenario – the base, pseudo-symmetric case:* In the base scenario, only the arms/hands are mobile and  
337 can adopt one of two distinct positions within an asymmetric unit, and the hand always remains co-occupied  
338 with an arm (Figure 1A). This case represents a common problem with pseudo-symmetric experimental  
339 datasets, whereby most of the molecule is homogeneous and characterized by symmetry (here, twofold),  
340 but one feature does not obey symmetry constraints (here, the arms/hands). There are four combinatorial  
341 possibilities, three of which would be expected to be recovered using a global classification strategy  
342 (structures A2 and A3 are degenerate and are related by 180° rotation). However, in an asymmetric focused  
343 classification centered on one side of the humanoid, one would expect to find only two non-degenerate  
344 possibilities, because the arm/hand can reside in only one of two structural states.

345  
346 *Second scenario – identifying small densities:* In the second scenario, we use focused classification to  
347 recover finer features within a more complex structural landscape. In addition to the arms occupying one  
348 of two distinct positions, the hands can be either present or absent, and their occupancy is completely  
349 randomized (Figure 1B). Thus, for each of the four structural states described in the base scenario, one  
350 would see four additional structural states represented by the presence or absence of each of two hands. In  
351 sum, there are 16 different combinatorial possibilities, global classification would be expected to uncover  
352 10 non-degenerate classes, but only four classes should be resolved using asymmetric classification.

353  
354 *Third scenario – identifying small densities and covariances:* The third scenario is identical to the second  
355 scenario, except that a hand on each asymmetric unit is always co-associated with its corresponding foot  
356 (Figure 1C). For example, if the left hand is present, so is the left foot, and if it is absent, the foot too is  
357 absent; the same applies to the opposite asymmetric unit. One can then classify on the hand only, but look  
358 at both the hand and foot areas in the resulting maps and count the number of times that density for the hand  
359 co-occurs with density for the foot. In doing so, one can begin to decipher patterns and relationships within  
360 distinct components.

361  
362 *3.2 Focused classification on an asymmetric subunit of a synthetic humanoid*

363  
364 For each of the three cases described above, and for all five levels of noise, we performed focused  
365 classifications on a single asymmetric unit, with a mask around the region encompassing an arm and hand  
366 (Figure 2A). For these experiments, the particle alignment parameters were set to the correct parameters

367 used to generate the data and were kept fixed during classification. To quantitatively evaluate the accuracy  
368 of classification, we used the  $\kappa$  coefficient as a statistical measure, which captures the performance of a  
369 diagnostic test, while taking into account the possibility of occurrence by chance [51]. We also used the  
370 Youden's J statistic (informedness, [52]), but found that the results largely paralleled those of  $\kappa$  (data not  
371 shown). The  $\kappa$  coefficient evaluates the agreement of raters for classifying N items into mutually exclusive  
372 classes and relies on the precise knowledge of the number of false positives (FP), false negatives (FN), true  
373 positive (TP), and true negatives (TN), which we can obtain from the data (see Methods). Importantly,  $\kappa$   
374 estimates the probability of an "informed" decision by taking into account random chance and returns 0  
375 when classification is random (chance) and 1 when perfect classification is achieved. Qualitatively, it is  
376 simple to visually assess how "clean" the classification is, and whether or not the particles were correctly  
377 partitioned, by looking at the separation of the arms in our data. Supplementary Figure 2 shows how the  
378 results look when classification is nearly perfect (Supplementary Figure 2A), when classification is  
379 completely random (Supplementary Figure 2D), and two intermediate cases (Supplementary Figure 2B-C).  
380 A correct classification partitions the arms within a single asymmetric unit (and not its counterpart) into  
381 two distinct classes, with no signs of contaminating density ( $\kappa$  close to 1); as more errors are introduced,  
382 the two classes become progressively more mixed, up to a point where one cannot distinguish between the  
383 two volumes within or outside the asymmetric unit ( $\kappa$  close to 0, Supplementary Figure 2). In this manner,  
384 we could also determine which parameters provide optimal classification results (e.g. mask size, soft edge  
385 drop-off, etc., as demonstrated in Supplementary Figure 3), which we determined prior to evaluating the  
386 test cases.

387  
388 Table 1 shows the result of focused classification for all three scenarios, using both a 2-D masking approach  
389 and a 3-D masking approach, as implemented in Frealign and evaluated using the  $\kappa$  coefficient. The  
390 resulting numbers indicate the following general trends. First, for all three cases and for virtually all SNRs,  
391 the 2-D masking approach was superior to the 3-D masking approach. Such a result is not surprising  
392 because, as indicated in the introduction, the disadvantage of the 3-D masking approach, in the absence of  
393 density subtraction, is that the experimental projection images contain overlapping density along the path  
394 of the projection, as compared to a projection of the masked region from the reference map. The second  
395 general trend is that, with more mobile components within a dataset, and the smaller the desired features  
396 for detection, the lower the  $\kappa$  value and the more challenging it is to correctly classify the data. We observe  
397 major differences in accuracy between case 1 and either 2 or 3, because the latter contain more moving  
398 parts. However, the accuracies between cases 2 and 3 are roughly similar, likely because only small  
399 structural differences characterize the two datasets. Third, a lower SNR makes it more challenging to

400 correctly classify the data, which is not surprising. However, it was surprising that, for the base scenario,  
401 even at the lowest SNRs and given how small of a feature we were trying to detect, we could still recover  
402 meaningful information and reasonably clean classes using the 2-D masking approach in particular, and to  
403 a lesser extent using the 3-D masking approach. In scenarios 2-3, higher SNRs were required to recover  
404 the correct classes (0.025 compared to 0.006, or ~4 times as high).

405  
406 Our experiments reveal that the 2-D masking approach, in its implementation within the likelihood-based  
407 framework of Frealign/*cis*TEM, does not completely isolate the area of interest from its surrounding  
408 density. While the 2-D masking approach produces more accurate results in the cases analyzed, its primary  
409 disadvantage is that projection images can contain additional density along the direction of the projection;  
410 if this density is homogeneous, it should be neutral in terms of classification, but if it is itself heterogeneous,  
411 it can bias the classification results. To account for this and to quantify the bias, we went back to the base  
412 scenario, where only the arm/hand combinations can move, but applied the mask onto an area of a leg and  
413 classified in that region (Figure 2B). We thus asked whether we can recover density for the arms, despite  
414 the mask being situated in a different location. As before, the number of correctly assigned particles was  
415 judged based on the arm/hand classes. If the arms completely determine the classification results, we would  
416 expect to see a  $\kappa$  coefficient of 1, whereas in the absence of crosstalk between arms and legs, the arms/hands  
417 would be randomly assigned and the  $\kappa$  coefficient would be 0. Table 2 shows that only at the highest SNRs  
418 does the heterogeneity outside of the area of interest influence the classification, and with a maximum  $\kappa$   
419 coefficient of 0.23, the bias is not very severe. For SNR values of 0.025 and below, the results are  
420 effectively random. For the same dataset, a  $\kappa$  coefficient of 0.87 is obtained for an SNR of 0.025 when the  
421 mask is in its correct position around an arm. In contrast to the 2-D mask, when a 3-D mask is applied to  
422 the same location, the results are completely random at all SNRs. This is exactly what we would expect,  
423 because density outside this mask should not be introduced into a projection image after application of a 3-  
424 D mask. The above results indicate that bias generated by heterogeneity outside the area of interest is  
425 present but minor when using the 2-D masking approach, and absent in the 3-D masking approach.

426  
427 *3.3 Focused classification can identify covariant components in distinct regions of a map*

428  
429 Each individual object within a heterogeneous single-particle cryo-EM experiment can contain a unique  
430 combination of dynamic elements residing in distinct structural states. When multiple components are  
431 dynamic, and/or if they bind (or dissociate) in different regions, the conformational/compositional states of  
432 the components can be linked. Using focused classification, one can treat two distinct regions separately,  
433 and then ask whether there is any inter-dependence by calculating covariances within masked regions.

434  
435 To evaluate covariance between distinct regions of a map, we used the datasets prepared for scenarios 2-3.  
436 In scenario 2, the presence of either hand, or either foot, are random and are not related to one another. In  
437 contrast, in scenario 3, the presence of a hand on one side of the humanoid is always correlated to the  
438 presence of a foot on that same side, whereas the opposite foot is randomly occupied and is not correlated  
439 to anything. Thus, one can apply a mask around the hands (encompassing both conformations), focus-  
440 classify the data, and then look for the presence or absence of a foot, which has not been subjected to  
441 focused classification. Quantitatively, once the dataset is classified and subdivided into groups, one would  
442 simply calculate the fractional density occupied by each component within the class (e.g. hand in position  
443 1, hand in position 2, near foot, and far foot) normalized to its expected value, and compute a normalized  
444 covariance matrix (also known as a correlation coefficient matrix, see Methods) between the components.  
445 Since the presence of a foot is always correlated with the hand on the same side of the humanoid,  
446 irrespective of the conformation of the arm/hand, we further simplify the analysis by grouping both  
447 mutually exclusive hand positions into, more generally, a “near hand”. Thus, there are three regions for  
448 which fractional occupancies are computed – a “near hand” (blue in Figure 3), where the mask is applied  
449 for classification, a “near foot” (purple in Figure 3) on the same side of the humanoid, and a “far foot” (pink  
450 in Figure 3) on the opposite side of the humanoid. Given the nature of the mask, everything except for the  
451 hands is excluded from the classification. Since the mask is applied on an asymmetric-unit basis, the region  
452 that would otherwise constitute the “far hands” is not separated, and both mixed conformations are  
453 observed.

454  
455 For scenario 2, whereby no covariance is expected, the volumes captured through focused classification on  
456 an asymmetric-unit basis, and representing the four non-degenerate classes, are displayed in Figure 3A. As  
457 expected, they differ in the presence, absence, and overall conformation of the hands. For example, classes  
458 1,2 or classes 3,4 differ by the presence or absence of a single hand; classes 1,3 or classes 2,4 either do or  
459 don't have hands, respectively, but differ in the conformation of the arms; finally, classes 1,4 or classes 2,3  
460 differ in both hand occupancy and arm conformation. Other than the hand/arm differences, no other regions  
461 of the maps have any apparent variability. Quantitatively, this is summarized by a normalized covariance  
462 matrix that describes the relative interdependence between the different components (Figure 3B). A value  
463 of 1 means that the pairwise occupancies of any two components are perfectly correlated, whereas a value  
464 of 0 means that they are completely random (a value of -1 means that they are anti-correlated). Identical  
465 components, related by the diagonal, are perfectly correlated, by definition. Otherwise, it is apparent that  
466 no two regions of the map are correlated to one another. This situation is different for scenario 3, however,  
467 which was designed to have the nearby hand and foot co-vary. The volumes captured through focused

468 classification again represent the expected non-degenerate classes, and the hands/arms are related to one  
469 another in an identical manner as before. However, this time, it is clear that classes 2 and 4 are missing the  
470 nearby foot, whereas classes 1 and 3 maintain full occupancy. The normalized covariance matrix now  
471 shows that the hand is always co-associated with the nearby foot. The occupancy of the far foot, on the  
472 other hand, remains random, and is accordingly associated with a low normalized covariance value. The  
473 same experiment can be performed for more complicated combinations of hands and feet, but the principle  
474 is the same – that assessing the inter-dependence of density occupancies within distinct regions of a  
475 macromolecular complex can provide insight into hidden allostery within the data.

476

### 477 *3.4 Focused classification facilitates deconvolving heterogeneous regions within an experimental* 478 *dataset*

479

480 The techniques described here have been used to decipher both conformational and compositional  
481 heterogeneity within biological samples (for example, [16,26,53]). In addition to the published results, one  
482 area where they will be particularly useful is to deconvolve conformational heterogeneity when using  
483 scaffolds for the purpose of structure determination. Several groups have shown that larger protein and/or  
484 nucleic-acid scaffolds can be used to aid in the determination of smaller structures, which by themselves  
485 would be too challenging to analyze [54,55]. However, the problem with all current approaches is that the  
486 particles of interest are not necessarily rigidly bound. Thus, the regions closer to the site of attachment will  
487 be characterized by less heterogeneity (and a lower B-factor), whereas the regions further from the site of  
488 attachment will exhibit more heterogeneity (and a higher B-factor). To demonstrate this, we used a bacterial  
489 70S ribosome as a scaffold, and engineered in a fusion RNA representing the HIV-1 Transactivation  
490 Response (TAR) element. Subsequently, we performed either global classifications on the entire dataset  
491 or focused classifications on the region around TAR.

492

493 The HIV-1 TAR element was uniformly inserted into Helix 45 of the E. coli large 23S ribosomal RNA.  
494 Ribosomes containing the TAR knock-in were selectively purified (see Methods) and subjected to single-  
495 particle cryo-EM analysis. We collected 929 micrographs, providing 346,851 particles in the dataset  
496 (Supplementary Figure 4A). A single-model refinement, in the absence of any classification, showed high-  
497 resolution in the ribosome core, and lower resolution in the regions characterized by structural heterogeneity  
498 (Supplementary Figure 4B-C). Due to a large amount of mobility, the site of TAR fusion was only partially  
499 visible at the normal thresholds used for displaying the coulombic potential map. We then performed a  
500 global classification of the data, using a soft-edge spherical mask. This procedure resulted in distinct  
501 classes, separated according to the expected heterogeneity associated with purified bacterial ribosomes [56]

502 (Supplementary Figure 4D). The combined differences are summarized with a merged map, demonstrating  
503 the full extent of heterogeneity for the global classification case (Figure 4A); notably, the resolved  
504 heterogeneity did not improve the density at the site of fusion. Subsequently, we performed a focused  
505 classification of the data using 2-D masks, applying the mask to the area where TAR has been inserted. As  
506 expected, the resulting maps were able to clearly separate out some of the different conformations of TAR  
507 (Supplementary Figure 4E). However, the majority of the normal ribosomal heterogeneity was largely  
508 ignored, as summarized by the merged difference maps (Figure 4B) and an overlay of the reconstructed  
509 classes (Figure 4C). In terms of characterizing classification performance, this result is important for  
510 several reasons. First, even though the area of interest is small, the focused classification approach using  
511 2-D masks can partially deconvolve the density. Second, despite the extensive “normal” structural  
512 heterogeneity present on bacterial ribosomes (e.g. Figure 4A), which may confound the 2-D focused  
513 classification approach (e.g. Figure 2 and Table 2), we do not observe this in our results. We also performed  
514 focused classifications using 3-D masks, but the quality of the reconstructed TAR region was noticeably  
515 poorer (data not shown), consistent with the poorer performance of the 3-D masking approach using  
516 synthetic data (e.g. Table 1). These experimental results further demonstrate the ability of the 2-D masking  
517 approach to separate out local structural variabilities in the context of otherwise extensive global structural  
518 differences.

519  
520 The best reconstruction of HIV-1 TAR showed a clearly defined RNA helix, a marked improvement over  
521 a global classification strategy alone (Figure 4D). The density was characterized by progressively poorer  
522 resolution, as a function of distance from the site of attachment. For a largely A-form HIV-1 TAR RNA  
523 helix, the behavior of the fusion can be thought of as a lever pivoting around a fulcrum; the further out from  
524 the point of attachment, the more inherent mobility, and thus the lower the resolution. A similar behavior  
525 has been observed with other scaffolding strategies, whereby the peripheral regions are characterized by  
526 lower resolution [54,55]. In addition to providing novel biological insight, focused classifications can  
527 broadly facilitate scaffolding approaches for solving structures of small proteins and RNAs.

#### 528 529 **4. Discussion**

530  
531 Using a synthetic dataset, we describe a quantitative assessment for several focused classification  
532 implementations within the FREALIGN/*cis*TEM processing packages. The algorithms have been used to  
533 classify features in several experimental studies [16,26,53], and we further demonstrate the applicability of  
534 the approaches for deconvolving heterogeneous regions within small scaffolded RNAs to facilitate the  
535 development of substrate supports for cryo-EM [54,55].



536  
537 The present study will help users decide which strategy to use in a particular case. Focused classification  
538 using 2-D masks can be applied to individual asymmetric features (also known as symmetry expansion  
539 [27]), and, as implemented within Frealign/*cis*TEM, have generally been found to perform better than 3-D  
540 masking approaches, due to density mismatch between particles images and reference projections after 3-  
541 D masking. A possible disadvantage of the 2-D masking approach arises from the projection nature of the  
542 data. Any area within a 2-D projection image will not only contain density relevant to the region of interest,  
543 but also residual density along the projection path. If the residual density is itself heterogeneous, it can  
544 potentially confuse or bias the classification procedure (especially if the variability within the region of  
545 interest is significantly smaller compared to variability elsewhere). In Table 2, we demonstrate that this  
546 effect is real, at least with high SNR data. However, in practice this problem appears to be small, based on  
547 the results obtained with the synthetic data (compare Tables 1 and 2), and in an experimental setting in the  
548 context of large-scale global heterogeneity in the current work (Figure 4A-B), and in previous biological  
549 studies [16,18]. Conflating heterogeneity along the projection path would be treated as noise, in a manner  
550 that is perhaps analogous to incomplete density subtraction.

551  
552 Our tests with the synthetic dataset demonstrate that additional questions, such as those pertaining to  
553 structural allostery, can be addressed in single-particle experiments. We showed how classifying variability  
554 in a region of a density map can reveal covariance with a secondary region, in this case between a hand and  
555 a foot. With synthetic data, such analyses are predicated upon having knowledge of the real density; in an  
556 experimental setting, an analogous approach would mask out regions corresponding to, for example, known  
557 components prior to analyzing the resulting normalized covariance matrices, as has been previously shown  
558 in one simplified example with ribosome-associated factors [57]. In general, the ability to classify  
559 independently on separate regions of a map provides opportunities to inter-relate distinct regions of an  
560 object beyond simply recovering densities, a form of computational identification of allostery within a  
561 system. Some cautions should be taken in the analyses of covariance. First, to avoid under-sampling, it is  
562 advisable to compute an equal or greater number of classes than expected. Second, and related to the  
563 previous point, classifications should be run multiple times, starting from different random particle seeds.  
564 Both of these precautions will ensure that sufficient pairwise occupancies have been calculated to reach  
565 statistical significance and avoid spurious correlations. Third, some caution should be taken in the  
566 interpretations of results using 2-D masks (due to the possibility of “leaky” biases during classification),  
567 although our experimental observations suggest that the biases should be minimal (Figure 4B). Finally,  
568 global classifications can also be used for the purpose of covariance analysis, and they can have specific  
569 advantages, as they would recover non-degenerate differences that are lost during classification on an

570 individual asymmetric unit (which is easily seen with the experimental setup of the humanoid, as the  
571 number of non-degenerate structures (globally) far outnumbers the number of distinct asymmetric units).  
572 Whereas focused classifications help constrain the number of different classes and can simplify the analysis,  
573 the results should ideally relate to the global context of heterogeneity. In the future, more elaborate methods  
574 could be devised for broader applicability beyond pairwise covariances.

575

576 Our results using HIV-1 TAR fused to bacterial large ribosomal subunits show how focused classifications  
577 can help computationally deconvolve highly mobile features within experimental cryo-EM datasets. These  
578 data are particularly applicable for the development of structural scaffolds for the analysis of small proteins  
579 and RNAs [54,55]. The TAR fusions are universally mobile about a central fulcrum point, which  
580 corresponds approximately to the site of attachment, and the density is lost in the absence of proper  
581 classification. However, careful application of masks during focused classification enables partial recovery  
582 of some of the structural elements within the TAR fusion, visualizing most of the A-form RNA helix.  
583 Scaffolding approaches are gaining popularity in single-particle analysis, because small proteins may not  
584 have sufficient signal for accurate assignment of Eulerian orientations. Focused classification can help  
585 ameliorate problems associated with structural mobility and bring out the most of the structure of interest.

586

587 **Acknowledgements**

588 We thank Dr. Kurt Fredrick for assistance and helpful discussions regarding the ribosome purifications,  
589 Bill Anderson for help with cryo-EM data collections. We acknowledge the support of NIH grants RO1  
590 GM065056 (to KMF) and P50 GM103368 (HIVE Center, to KMF and DL). DL also acknowledges the  
591 support of DP5 OD021396. WAC was supported by a Pelotonia Postdoctoral Fellowship from the Ohio  
592 State University. NG is an Investigator of the Howard Hughes Medical Institute.

593

594 **Conflict of Interest**

595 The authors declare no competing financial interests.

596

597 **Author Contributions**

598 WAC, KMF, NG and DL designed the study. NG is the primary developer of Frealign and *cis*TEM. DL  
599 prepared and performed calculations with the simulated data. CZ, WAC and YJ performed the calculations  
600 with experimental data. CZ, WAC, NG and DL analyzed the data. DL wrote the paper, with help from all  
601 authors.

602

603 **Code availability**

604 Frealign and *cis*TEM are open-source and distributed under the Janelia Research Campus Software License  
605 ([http://license.janelia.org/license/janelia\\_license\\_1\\_2.html](http://license.janelia.org/license/janelia_license_1_2.html)). All scripts and datasets for these studies will  
606 be made available from the Lyumkis laboratory upon request.

607

608

609  
610

## Figure and table legends

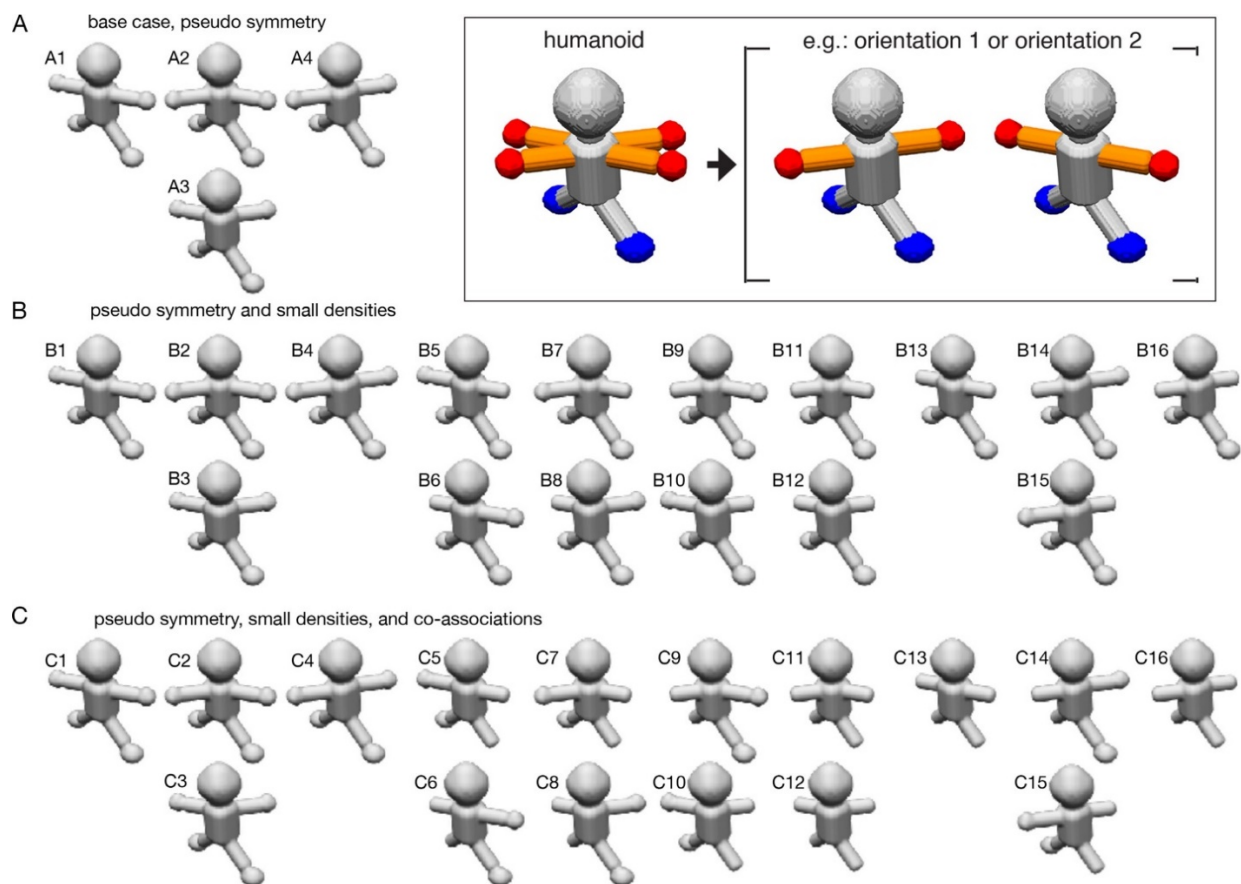

611  
612

613 **Figure 1 – humanoid datasets and distinct scenarios used to assess focused classification.** Different  
614 maps used to generate synthetic datasets described by the three scenarios are displayed. In each panel, A-  
615 C, two maps which are degenerate and related to one another by a 180° rotation are positioned vertically  
616 with respect to one another. The components used to generate the datasets are displayed in the inset, with  
617 the heterogeneous elements colored (arms, orange; hands, red; feet, blue). (A) For the base scenario, only  
618 the arms/hands are conformationally mobile. Four different combinations of maps lead to a dataset  
619 characterized by two different asymmetric units. Maps A2/A3 are related by a 180° rotation. (B) For the  
620 second scenario, in addition to the conformational mobility of the arms, the hands can be either present or  
621 absent. 16 different combinations of maps lead to a dataset characterized by four different asymmetric  
622 units. Maps B2/B3, B5/B6, B7/B8, B9/B10, B11/B12, and B14/B15 are related by a 180° rotation. (C)  
623 For the third scenario, in addition to the conformational mobility of the arms, the hands can be either present  
624 or absent, but their occupancy is *always* co-associated with a nearby foot. 16 different combinations of  
625 maps lead to a dataset characterized by four different asymmetric units. Maps C2/C3, C5/C6, C7/C8,  
626 C9/C10, C11/C12, and C14/C15 are related by a 180° rotation.

627

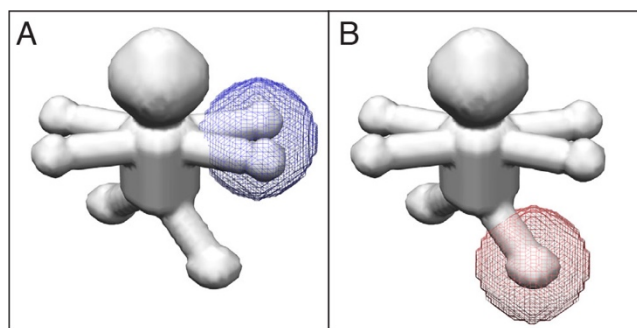

628

629

630 **Figure 2 – Application of masks onto regions of an asymmetric unit.** Masks were applied either (A)

631 onto the arm/hand region (blue) or (B) the leg region (red) prior to focused classification. Both types of

632 asymmetric units are displayed, showing both orientations of the arm/hand combinations.

633

634

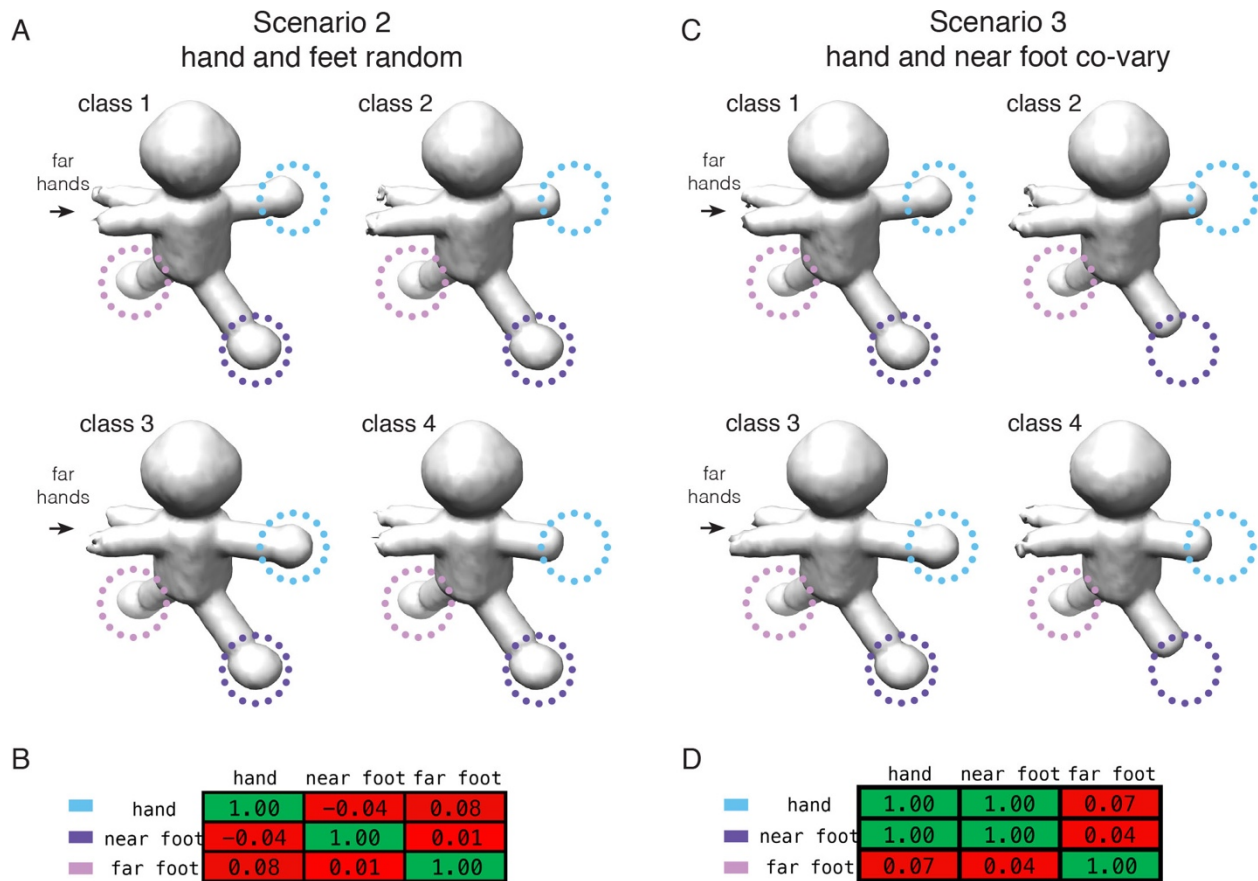

635

636

637 **Figure 3 – Evaluation of covariance within two different regions of a reconstructed object.** Focused  
 638 classifications using 2-D masks, applied to an arm/hand region (to the right of body in figure and  
 639 encompassing both arm/hand conformations), were performed using either (A-B) the dataset for the 2<sup>nd</sup>  
 640 scenario or (C-D) the dataset for the 3<sup>rd</sup> scenario, both at an SNR of 0.100. In all cases, four classes were  
 641 recovered for the different asymmetric units (arms in two positions, each with and without a hand), and are  
 642 displayed in panels A and C. (A) Volumes recovered from focused classification in the 2<sup>nd</sup> scenario, where  
 643 all components are randomly occupied (control). (B) Normalized covariance matrix describing the  
 644 relationships between the near hand, near foot, and far foot. (C) Volumes recovered from focused  
 645 classification in the 3<sup>rd</sup> scenario, where the near hand is always co-associated with the near foot. (D)  
 646 Normalized covariance matrix describing the relationships between the components. Near hand, where  
 647 focused classification is performed, is circled in blue, near foot is circled in purple, and far foot is  
 648 circled in pink. In the tables, the values are colored using a gradient: -1 (green, anti-correlated) < 0 (red, not  
 649 correlated) < 1 (green, correlated).

650

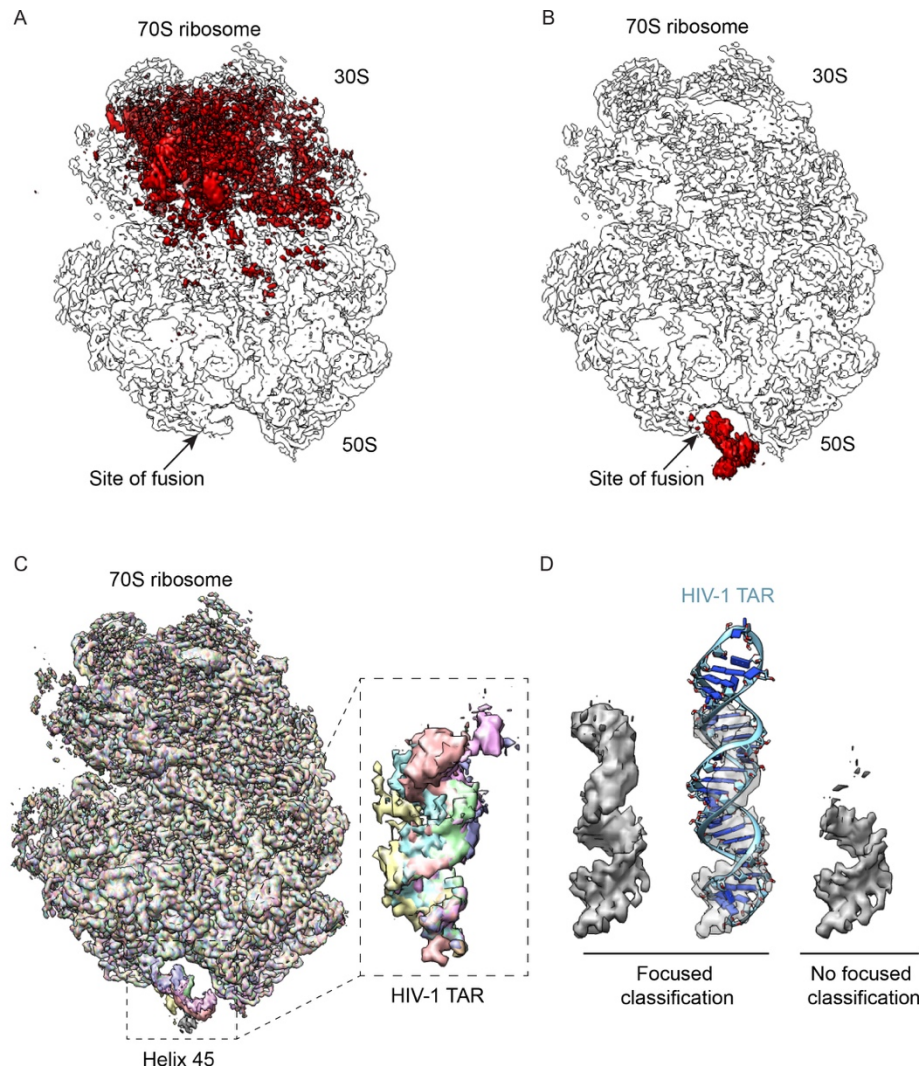

651  
652  
653

654 **Figure 4 – Experimental reconstructions highlighting the use of focused classification to analyze**  
655 **highly heterogeneous datasets.** Bacterial 70S ribosomes containing an HIV-1 TAR element fused into  
656 Helix 45 (H45) were used to analyze different classification approaches. (A) Combinatorial pairwise  
657 differences between all 8 classes from global classification merged into a single volume to highlight the  
658 overall variability. (B) Same as A, but from the result of focused classification using 2-D masks, applied  
659 on the region of TAR fusion into H45. In both A-B, arrows denote the site of fusion. (C) Overlaid  
660 reconstructions after focused classification, highlighting the differences within the TAR element, but not in  
661 the rest of the ribosome. (D) Close-up of TAR reconstruction after deconvolving its mobility through  
662 focused classifications (left), shown also with a rigid-body docking of the TAR element into density  
663 (middle). A control reconstruction, without focused classification but using the same number of particles,  
664 is displayed alongside (right).

|              | Scenario 1 | Scenario 1 | Scenario 2 | Scenario 2 | Scenario 3 | Scenario 3 |
|--------------|------------|------------|------------|------------|------------|------------|
| SNR          | 2-D mask   | 3-D mask   | 2-D mask   | 3-D mask   | 2-D mask   | 3-D mask   |
| <b>0.100</b> | 0.99       | 0.91       | 0.85       | 0.70       | 0.87       | 0.71       |
| <b>0.050</b> | 0.96       | 0.85       | 0.73       | 0.56       | 0.75       | 0.61       |
| <b>0.025</b> | 0.87       | 0.74       | 0.42       | 0.41       | 0.46       | 0.39       |
| <b>0.013</b> | 0.72       | 0.57       | 0.21       | 0.17       | 0.21       | 0.17       |
| <b>0.006</b> | 0.47       | 0.36       | 0.09       | 0.08       | 0.08       | 0.09       |

665

666

667 **Table 1 – Results of focused classification on an asymmetric unit for the three different scenarios.**

668 Five different SNRs are evaluated, and the  $\kappa$  coefficient is displayed for the 2-D masking and 3-D masking

669 case for each of three scenarios.

670



| SNR               | 2-D mask | 3-D mask |
|-------------------|----------|----------|
| <b>0.100</b>      | 0.23     | -0.01    |
| <b>0.050</b>      | 0.11     | 0.00     |
| <b>0.025</b>      | 0.01     | 0.01     |
| <b>0.013</b>      | 0.00     | 0.01     |
| <b>0.006</b>      | 0.00     | 0.00     |
| <b>pure noise</b> | -0.01    | 0.00     |

671

672

673 **Table 2 – Results of focused classification on an asymmetric unit when the mask is applied on the**

674 **wrong region.** Classification was performed after application of a 2-D mask or 3-D mask onto a leg (see

675 Figure 2B), while the heterogeneity was characterized by the mobility in the arms/hands (scenario 1), and

676 the  $\kappa$  coefficient was evaluated for the five SNRs and for each mask. Whereas the 2-D masking displayed

677 some “leakiness” at the highest SNRs, the 3-D masking showed completely random classification.

678

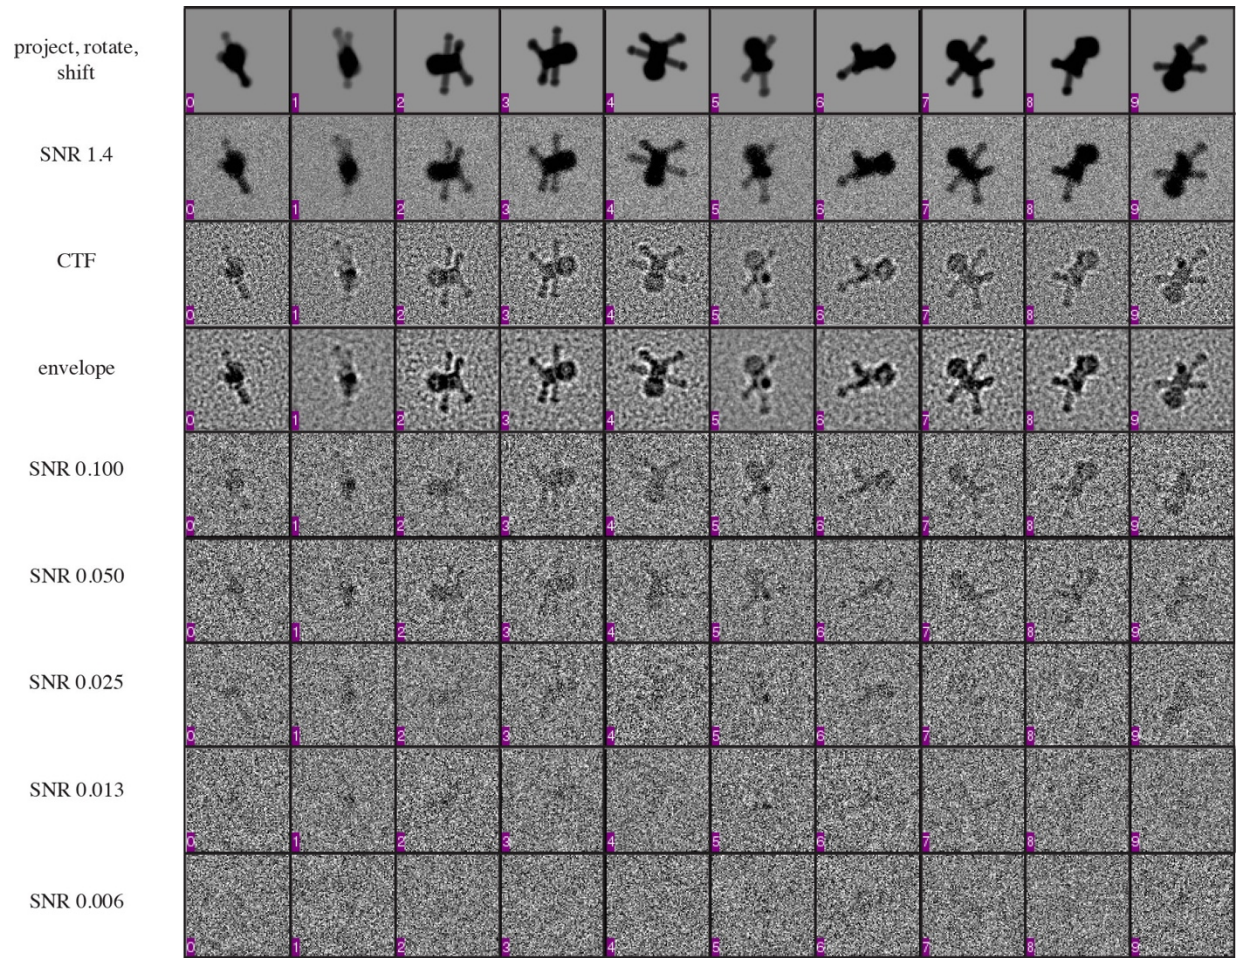

679

680

681 **Supplementary Figure 1 – synthetic data generated from the humanoid volumes.** Each volume was  
682 randomly projected, rotated, and shifted. Noise was then applied to the projection images, followed by a  
683 CTF and envelope function, and lastly the level of noise was brought down to one of five different levels  
684 (0.100, 0.050, 0.025, 0.013, and 0.006), as previously described [8]. The different projections were then  
685 randomly inserted into a 10,000-particle dataset for focused classification experiments.

686

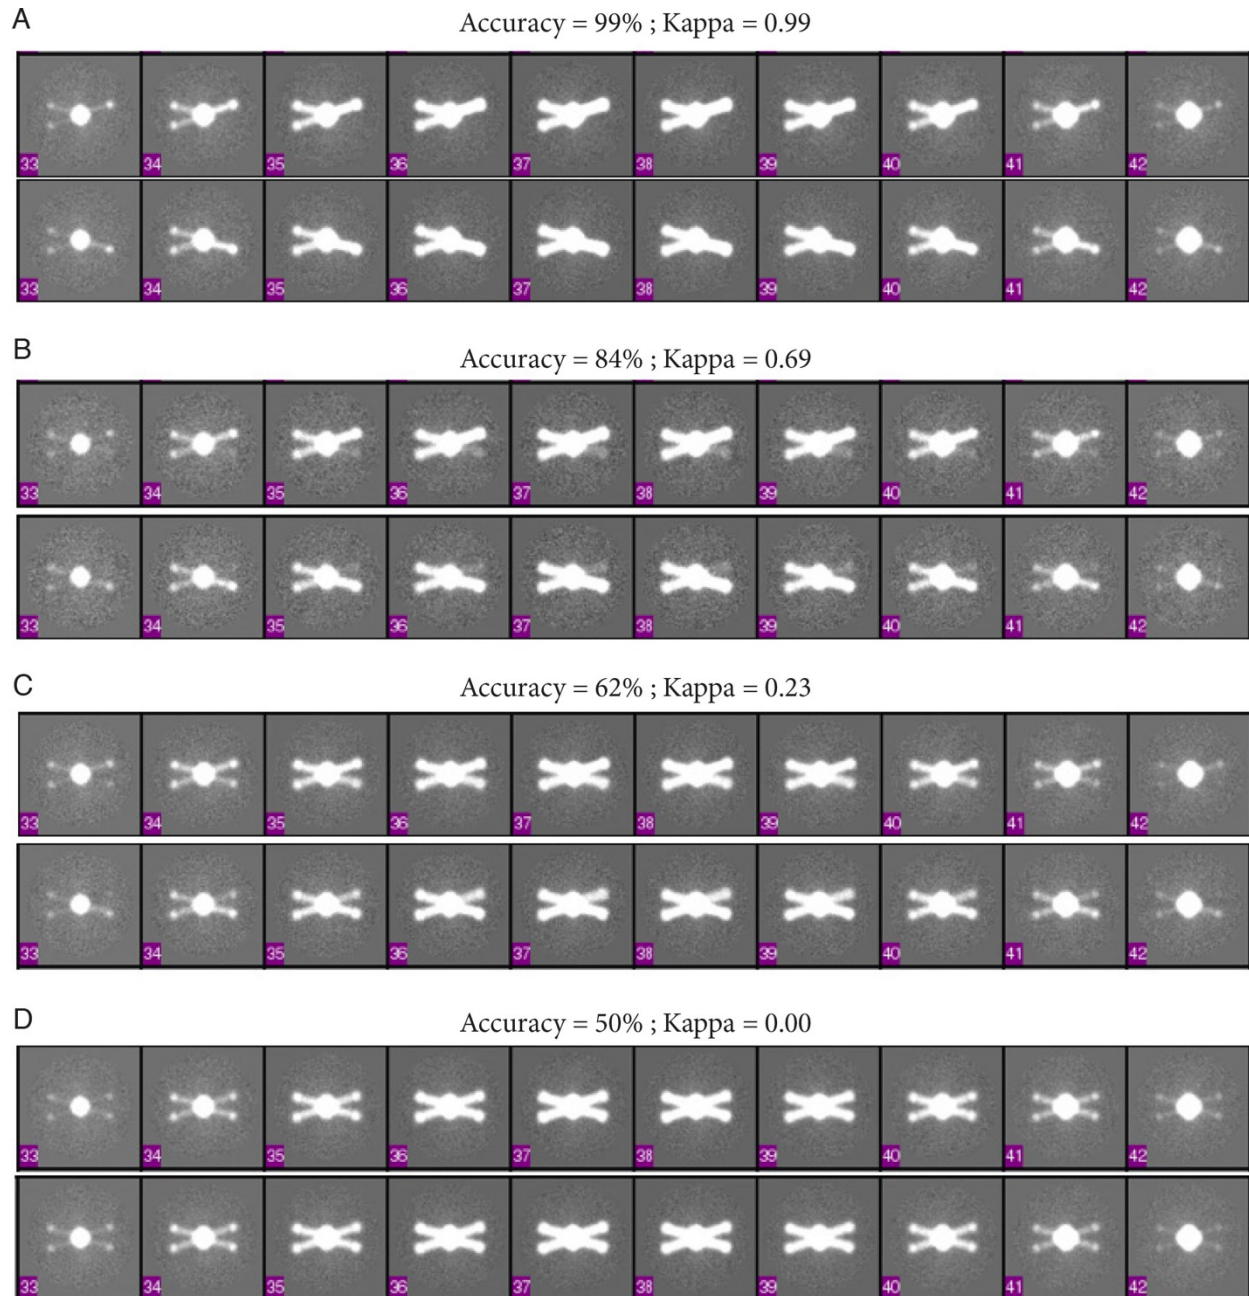

687

688

689 **Supplementary Figure 2 – visual demonstration of classification accuracy.** Slices through a  
690 reconstruction are displayed for each panel (middle slices 33-42 within a 96-slice volume, for each of two  
691 distinct classes [top and bottom]) around the Z-height of the arms. Classification was performed on the  
692 right asymmetric unit and for the base dataset, where two different classes are expected. Ideally, only the  
693 right arms would partition into one of several different classes. Classification was performed under four  
694 different levels of noise, which resulted in distinct accuracies. Panels A-D demonstrate how the accuracies,  
695 the associated  $\kappa$  coefficient, and the density varies with increasing errors. (A) Accuracy is nearly perfect,

696  $\kappa$  is close to 1 and the two classes show complete distinction in the right arm region. (B) Accuracy is worse,  
697  $\kappa$  is has dropped to 0.69, and some contamination is evident in the opposing arm. (C) Accuracy has dropped  
698 further,  $\kappa$  is close to 0, and the two volumes become virtually indistinguishable, although some differences  
699 within the density amplitude point to residual heterogeneity. (D) Accuracy is completely random (50%  
700 represents a coin toss when two possibilities are present),  $\kappa$  is correspondingly 0, and no difference in the  
701 maps is evident.  
702

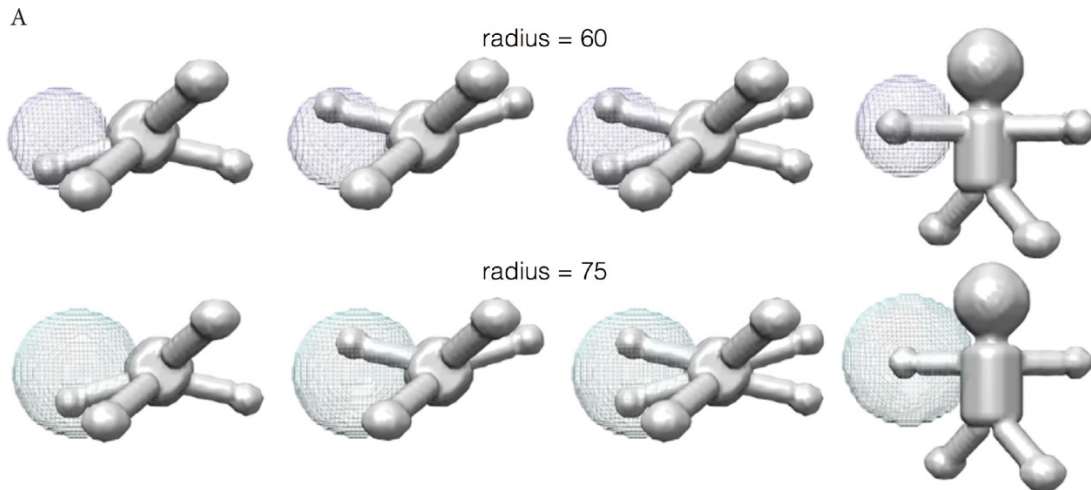

B

| mask radius | Kappa coefficient |
|-------------|-------------------|
| 150         | 0.26              |
| 120         | 0.31              |
| 90          | 0.38              |
| 75          | 0.80              |
| 70          | 0.84              |
| 65          | 0.85              |
| 60          | 0.85              |
| 55          | 0.84              |
| 50          | 0.82              |

703

704

705 **Supplementary Figure 3 – titration of mask size used for focused classification.** Focused classification

706 parameters could be tuned for optimal performance with this particular dataset. Here, the mask size was

707 varied, and the results were followed by monitoring  $\kappa$ . (A) Two different mask sizes are displayed, applied

708 to an asymmetric unit around the arms/hands. (B) The results of focused classification with different mask

709 radii. Here, a 60 Å mask performs optimally, which effectively represents a tight mask that completely

710 encompasses only the mobile area.

711

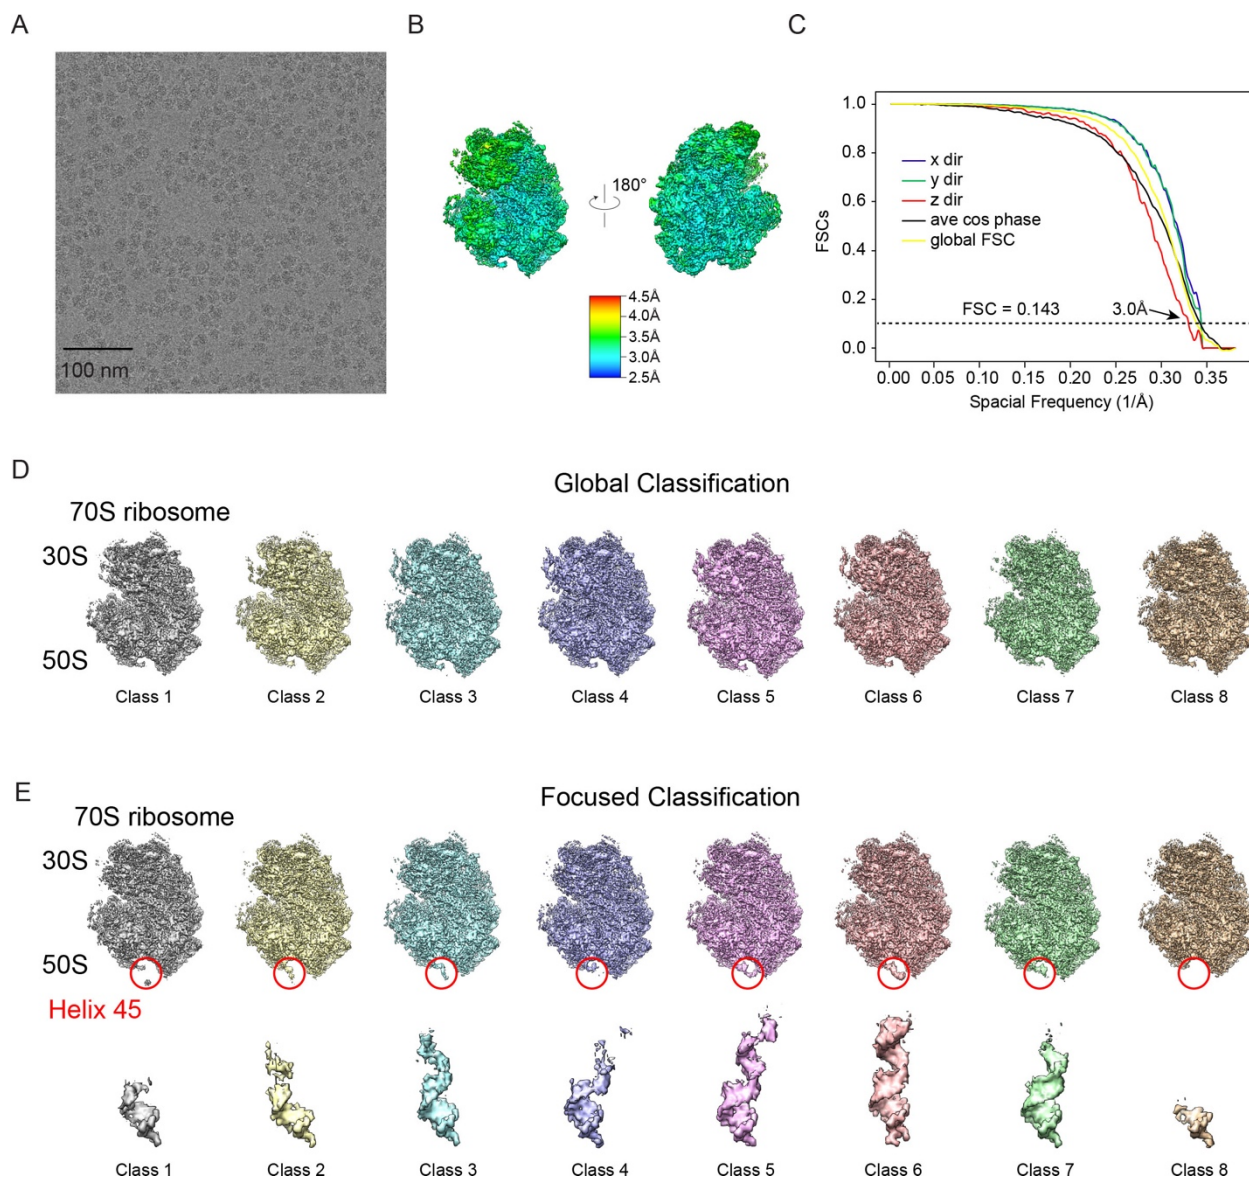

712

713

714 **Supplementary Figure 4 – Cryo-EM data for HIV-1 TAR—ribosome fusions.** (A) Example raw image  
 715 collected for TAR-labeled ribosomes. (B) Initial single-model refinement, colored by local resolution and  
 716 (C) the corresponding FSC curves. (D) Classes generated from global 3-D classification showing a lack of  
 717 density in the region of helix 45. (E) Classes from focused 3-D classification, with the mask applied to the  
 718 region of TAR fusion, denoted by a red circle with the corresponding densities of the TAR hairpin in the  
 719 absence of the ribosome scaffold below.

720

721

722

## References

723

- 724 [1] Y. Cheng, N. Grigorieff, P.A. Penczek, T. Walz, A primer to single-particle cryo-electron  
725 microscopy, *Cell*. 161 (2015) 438–449. doi:10.1016/j.cell.2015.03.050.
- 726 [2] E. Nogales, The development of cryo-EM into a mainstream structural biology technique, *Nature*  
727 *Methods*. 13 (2016) 24–27. doi:10.1038/nmeth.3694.
- 728 [3] A. Bartesaghi, C. Aguerrebere, V. Falconieri, S. Banerjee, L.A. Earl, X. Zhu, et al., Atomic  
729 Resolution Cryo-EM Structure of  $\beta$ -Galactosidase, *Structure*. (2018).  
730 doi:10.1016/j.str.2018.04.004.
- 731 [4] Y.Z. Tan, S. Aiyer, M. Mietzsch, J.A. Hull, R. McKenna, J. Grieger, et al., Sub-2 Å Ewald  
732 Curvature Corrected Single-Particle Cryo-EM, *bioRxiv*. (2018) 305599. doi:10.1101/305599.
- 733 [5] K. Murata, M. Wolf, Cryo-electron microscopy for structural analysis of dynamic biological  
734 macromolecules, *Biochim. Biophys. Acta*. 1862 (2018) 324–334.  
735 doi:10.1016/j.bbagen.2017.07.020.
- 736 [6] S.H.W. Scheres, Processing of Structurally Heterogeneous Cryo-EM Data in RELION, in: *The*  
737 *Resolution Revolution: Recent Advances in cryoEM*, Elsevier, 2016: pp. 125–157.  
738 doi:10.1016/bs.mie.2016.04.012.
- 739 [7] H. Gao, M. Valle, M. Ehrenberg, J. Frank, Dynamics of EF-G interaction with the ribosome  
740 explored by classification of a heterogeneous cryo-EM dataset, *J. Struct. Biol.* 147 (2004) 283–  
741 290. doi:10.1016/j.jsb.2004.02.008.
- 742 [8] D. Lyumkis, A.F. Brilot, D.L. Theobald, N. Grigorieff, Likelihood-based classification of cryo-  
743 EM images using FREALIGN, *J. Struct. Biol.* 183 (2013) 377–388.  
744 doi:10.1016/j.jsb.2013.07.005.
- 745 [9] S.H.W. Scheres, H. Gao, M. Valle, G.T. Herman, P.P.B. Eggermont, J. Frank, et al.,  
746 Disentangling conformational states of macromolecules in 3D-EM through likelihood  
747 optimization, *Nature Methods*. 4 (2007) 27–29. doi:10.1038/nmeth992.
- 748 [10] C.M. Spahn, P.A. Penczek, Exploring conformational modes of macromolecular assemblies by  
749 multiparticle cryo-EM, *Curr. Opin. Struct. Biol.* 19 (2009) 623–631.  
750 doi:10.1016/j.sbi.2009.08.001.
- 751 [11] M. Valle, J. Sengupta, N.K. Swami, R.A. Grassucci, N. Burkhardt, K.H. Nierhaus, et al., Cryo-  
752 EM reveals an active role for aminoacyl-tRNA in the accommodation process, *Embo J.* 21  
753 (2002) 3557–3567. doi:10.1093/emboj/cdf326.
- 754 [12] Q. Zhou, X. Huang, S. Sun, X. Li, H.-W. Wang, S.-F. Sui, Cryo-EM structure of SNAP-SNARE  
755 assembly in 20S particle, *Cell Res.* 25 (2015) 551. doi:10.1038/cr.2015.47.
- 756 [13] X.-C. Bai, E. Rajendra, G. Yang, Y. Shi, S.H.W. Scheres, Sampling the conformational space of  
757 the catalytic subunit of human  $\gamma$ -secretase, *Elife*. 4 (2015). doi:10.7554/eLife.11182.
- 758 [14] P.A. Penczek, J. Frank, C.M. Spahn, A method of focused classification, based on the bootstrap  
759 3D variance analysis, and its application to EF-G-dependent translocation, *J. Struct. Biol.* 154  
760 (2006) 184–194. doi:10.1016/j.jsb.2005.12.013.
- 761 [15] S.L. Ilca, A. Kotecha, X. Sun, M.M. Poranen, D.I. Stuart, J.T. Huiskonen, Localized  
762 reconstruction of subunits from electron cryomicroscopy images of macromolecular complexes,  
763 *Nat Commun.* 6 (2015) 8843. doi:10.1038/ncomms9843.
- 764 [16] P.D. Abeyrathne, C.S. Koh, T. Grant, N. Grigorieff, A.A. Korostelev, S. Subramaniam,  
765 Ensemble cryo-EM uncovers inchworm-like translocation of a viral IRES through the ribosome,  
766 *Elife*. 5 (2016) e14874. doi:10.7554/eLife.14874.
- 767 [17] O. von Loeffelholz, S.K. Natchiar, N. Djabeur, A.G. Myasnikov, H. Kratzat, J.-F. Ménétrete, et  
768 al., Focused classification and refinement in high-resolution cryo-EM structural analysis of  
769 ribosome complexes, *Curr. Opin. Struct. Biol.* 46 (2017) 140–148.  
770 doi:10.1016/j.sbi.2017.07.007.
- 771 [18] A.B. Loveland, G. Demo, N. Grigorieff, A.A. Korostelev, Ensemble cryo-EM elucidates the

- 772 mechanism of translation fidelity, *Nature*. 546 (2017) 113–117. doi:10.1038/nature22397.
- 773 [19] T.H.D. Nguyen, W.P. Galej, X.-C. Bai, C.G. Savva, A.J. Newman, S.H.W. Scheres, et al., The  
774 architecture of the spliceosomal U4/U6.U5 tri-snRNP, *Nature*. 523 (2015) 47–52.  
775 doi:10.1038/nature14548.
- 776 [20] H.E. Autzen, A.G. Myasnikov, M.G. Campbell, D. Asarnow, D. Julius, Y. Cheng, Structure of  
777 the human TRPM4 ion channel in a lipid nanodisc, *Science*. 359 (2018) 228–232.  
778 doi:10.1126/science.aar4510.
- 779 [21] M.L. Oldham, N. Grigorieff, J. Chen, Structure of the transporter associated with antigen  
780 processing trapped by herpes simplex virus, *Elife*. 5 (2016) 213. doi:10.7554/eLife.21829.
- 781 [22] N. Grigorieff, Frealign: An Exploratory Tool for Single-Particle Cryo-EM, *Meth. Enzymol.* 579  
782 (2016) 191–226. doi:10.1016/bs.mie.2016.04.013.
- 783 [23] A. Ballandras-Colas, M. Brown, N.J. Cook, T.G. Dewdney, B. Demeler, P. Cherepanov, et al.,  
784 Cryo-EM reveals a novel octameric integrase structure for betaretroviral intasome function,  
785 *Nature*. 530 (2016) 358–361. doi:10.1038/nature16955.
- 786 [24] T. Grant, A. Rohou, N. Grigorieff, cisTEM, user-friendly software for single-particle image  
787 processing, *Elife*. 7 (2018) e14874. doi:10.7554/eLife.35383.
- 788 [25] J.T. Huiskonen, H.T. Jääliñoja, J.A.G. Briggs, S.D. Fuller, S.J. Butcher, Structure of a hexameric  
789 RNA packaging motor in a viral polymerase complex, *J. Struct. Biol.* 158 (2007) 156–164.  
790 doi:10.1016/j.jsb.2006.08.021.
- 791 [26] D.O. Passos, M. Li, R. Yang, S.V. Rebersburg, R. Ghirlando, Y. Jeon, et al., Cryo-EM  
792 structures and atomic model of the HIV-1 strand transfer complex intasome, *Science*. 355 (2017)  
793 89–92. doi:10.1126/science.aah5163.
- 794 [27] J.T. Huiskonen, Image processing for cryogenic transmission electron microscopy of symmetry-  
795 mismatched complexes, *Bioscience Reports*. (2018) BSR20170203. doi:10.1042/BSR20170203.
- 796 [28] R.I. Koning, J. Gomez-Blanco, I. Akopjana, J. Vargas, A. Kazaks, K. Tars, et al., Asymmetric  
797 cryo-EM reconstruction of phage MS2 reveals genome structure *in situ*, *Nat Commun.* 7  
798 (2016) 12524. doi:10.1038/ncomms12524.
- 799 [29] S.J. Ludtke, P.R. Baldwin, W. Chiu, EMAN: semiautomated software for high-resolution single-  
800 particle reconstructions, *J. Struct. Biol.* 128 (1999) 82–97. doi:10.1006/jsbi.1999.4174.
- 801 [30] Q. Liu, K. Fredrick, Contribution of intersubunit bridges to the energy barrier of ribosomal  
802 translocation, *Nucl. Acids Res.* 41 (2013) 565–574. doi:10.1093/nar/gks1074.
- 803 [31] D. Qin, N.M. Abdi, K. Fredrick, Characterization of 16S rRNA mutations that decrease the  
804 fidelity of translation initiation, *Rna*. 13 (2007) 2348–2355. doi:10.1261/rna.715307.
- 805 [32] T. Asai, D. Zaporozhets, C. Squires, C.L. Squires, An *Escherichia coli* strain with all  
806 chromosomal rRNA operons inactivated: Complete exchange of rRNA genes between bacteria,  
807 *Proceedings of the National Academy of Sciences*. 96 (1999) 1971–1976.  
808 doi:10.1073/pnas.96.5.1971.
- 809 [33] P. Gay, D. Le Coq, M. Steinmetz, T. Berkelman, C.I. Kado, Positive selection procedure for  
810 entrapment of insertion sequence elements in gram-negative bacteria, *J. Bacteriol.* 164 (1985)  
811 918–921.
- 812 [34] J. Chiu, P.E. March, R. Lee, D. Tillett, Site-directed, Ligase-Independent Mutagenesis (SLIM): a  
813 single-tube methodology approaching 100% efficiency in 4 h, *Nucl. Acids Res.* 32 (2004) e174–  
814 e174. doi:10.1093/nar/gnh172.
- 815 [35] C. Suloway, J. Pulokas, D. Fellmann, A. Cheng, F. Guerra, J. Quispe, et al., Automated  
816 molecular microscopy: the new Legimon system, *J. Struct. Biol.* 151 (2005) 41–60.  
817 doi:10.1016/j.jsb.2005.03.010.
- 818 [36] G.C. Lander, S.M. Stagg, N.R. Voss, A. Cheng, D. Fellmann, J. Pulokas, et al., Appion: an  
819 integrated, database-driven pipeline to facilitate EM image processing, *J. Struct. Biol.* 166  
820 (2009) 95–102.
- 821 [37] S.Q. Zheng, E. Palovcak, J.-P. Armache, K.A. Verba, Y. Cheng, D.A. Agard, MotionCor2:  
822 anisotropic correction of beam-induced motion for improved cryo-electron microscopy, *Nature*



- 823 Methods. 14 (2017) 331–332. doi:10.1038/nmeth.4193.
- 824 [38] T. Grant, N. Grigorieff, Measuring the optimal exposure for single particle cryo-EM using a 2.6  
825 Å reconstruction of rotavirus VP6, *Elife*. 4 (2015) e06980. doi:10.7554/eLife.06980.
- 826 [39] A. Rohou, N. Grigorieff, CTFIND4: Fast and accurate defocus estimation from electron  
827 micrographs, *J. Struct. Biol.* 192 (2015) 216–221. doi:10.1016/j.jsb.2015.08.008.
- 828 [40] A.M. Roseman, FindEM--a fast, efficient program for automatic selection of particles from  
829 electron micrographs, *J. Struct. Biol.* 145 (2004) 91–99.
- 830 [41] K. Zhang, Gctf: Real-time CTF determination and correction, *J. Struct. Biol.* 193 (2016) 1–12.  
831 doi:10.1016/j.jsb.2015.11.003.
- 832 [42] D. Kimanius, B.O. Forsberg, S.H. Scheres, E. Lindahl, S. Subramaniam, Accelerated cryo-EM  
833 structure determination with parallelisation using GPUs in RELION-2, *Elife*. 5 (2016) e18722.  
834 doi:10.7554/eLife.18722.
- 835 [43] S.H.W. Scheres, RELION: Implementation of a Bayesian approach to cryo-EM structure  
836 determination, *J. Struct. Biol.* 180 (2012) 519–530. doi:10.1016/j.jsb.2012.09.006.
- 837 [44] E.F. Pettersen, T.D. Goddard, C.C. Huang, G.S. Couch, D.M. Greenblatt, E.C. Meng, et al.,  
838 UCSF Chimera--a visualization system for exploratory research and analysis, *J Comput Chem.*  
839 25 (2004) 1605–1612. doi:10.1002/jcc.20084.
- 840 [45] G. Harauz, M. van Heel, Exact filters for general geometry 3-dimensional reconstruction, *Optik.*  
841 73 (1986) 146–156.
- 842 [46] Y.Z. Tan, P.R. Baldwin, J.H. Davis, J.R. Williamson, C.S. Potter, B. Carragher, et al.,  
843 Addressing preferred specimen orientation in single-particle cryo-EM through tilting, *Nature*  
844 *Methods*. 14 (2017) 793–796. doi:10.1038/nmeth.4347.
- 845 [47] M. Hohn, G. Tang, G. Goodyear, P.R. Baldwin, Z. Huang, P.A. Penczek, et al., SPARX, a new  
846 environment for Cryo-EM image processing, *J. Struct. Biol.* 157 (2007) 47–55.  
847 doi:10.1016/j.jsb.2006.07.003.
- 848 [48] N. Fischer, P. Neumann, A.L. Konevega, L.V. Bock, R. Ficner, M.V. Rodnina, et al., Structure  
849 of the E. coli ribosome-EF-Tu complex at <3 Å resolution by Cs-corrected cryo-EM, *Nature*.  
850 520 (2015) 567–570. doi:10.1038/nature14275.
- 851 [49] P. Emsley, B. Lohkamp, W.G. Scott, K. Cowtan, Features and development of Coot, *Acta*  
852 *Crystallogr. D Biol. Crystallogr.* 66 (2010) 486–501. doi:10.1107/S0907444910007493.
- 853 [50] N.R. Voss, D. Lyumkis, A. Cheng, P.-W. Lau, A. Mulder, G.C. Lander, et al., A toolbox for ab  
854 initio 3-D reconstructions in single-particle electron microscopy, *J. Struct. Biol.* 169 (2010) 389–  
855 398. doi:10.1016/j.jsb.2009.12.005.
- 856 [51] J. Cohen, A coefficient of agreement for nominal scales, *Educational and Psychological*  
857 *Measurement*. XX (1960) 37–46.
- 858 [52] W.J. Youden, Index for rating diagnostic tests, *Cancer*. 3 (1950) 32–35. doi:10.1002/1097-  
859 0142(1950)3:1<32::AID-CNCR2820030106>3.0.CO;2-3.
- 860 [53] A.B. Loveland, A.A. Korostelev, Structural dynamics of protein S1 on the 70S ribosome  
861 visualized by ensemble cryo-EM, *Methods*. 137 (2018) 55–66.  
862 doi:10.1016/j.ymeth.2017.12.004.
- 863 [54] Y. Liu, S. Gonen, T. Gonen, T.O. Yeates, Near-atomic cryo-EM imaging of a small protein  
864 displayed on a designed scaffolding system, *Proceedings of the National Academy of Sciences*.  
865 115 (2018) 3362–3367. doi:10.1073/pnas.1718825115.
- 866 [55] T.G. Martin, T.A.M. Bharat, A.C. Joerger, X.-C. Bai, F. Praetorius, A.R. Fersht, et al., Design of  
867 a molecular support for cryo-EM structure determination, *Proc. Natl. Acad. Sci. U.S.a.* 113  
868 (2016) E7456–E7463. doi:10.1073/pnas.1612720113.
- 869 [56] X. Agirrezabala, J. Lei, J.L. Brunelle, R.F. Ortiz-Meoz, R. Green, J. Frank, Visualization of the  
870 hybrid state of tRNA binding promoted by spontaneous ratcheting of the ribosome, *Mol. Cell*. 32  
871 (2008) 190–197. doi:10.1016/j.molcel.2008.10.001.
- 872 [57] D. Lyumkis, D. Oliveira Dos Passos, E.B. Tahara, K. Webb, E.J. Bennett, S. Vinterbo, et al.,  
873 Structural basis for translational surveillance by the large ribosomal subunit-associated protein

874 quality control complex, Proceedings of the National Academy of Sciences. 111 (2014) 15981–  
875 15986. doi:10.1073/pnas.1413882111.  
876
